# Supplementary material for: Dynamic changes of tumor gene expression during repeated pressurized intraperitoneal aerosol chemotherapy (PIPAC) in women with peritoneal cancer
Source: PubMed Central journal article supplement (PMC4992274; doi:10.1186/s12885-016-2668-4), 2016-08-19
Supplement: 12885_2016_2668_MOESM4_ESM.pdf [file 12885_2016_2668_MOESM4_ESM.pdf]

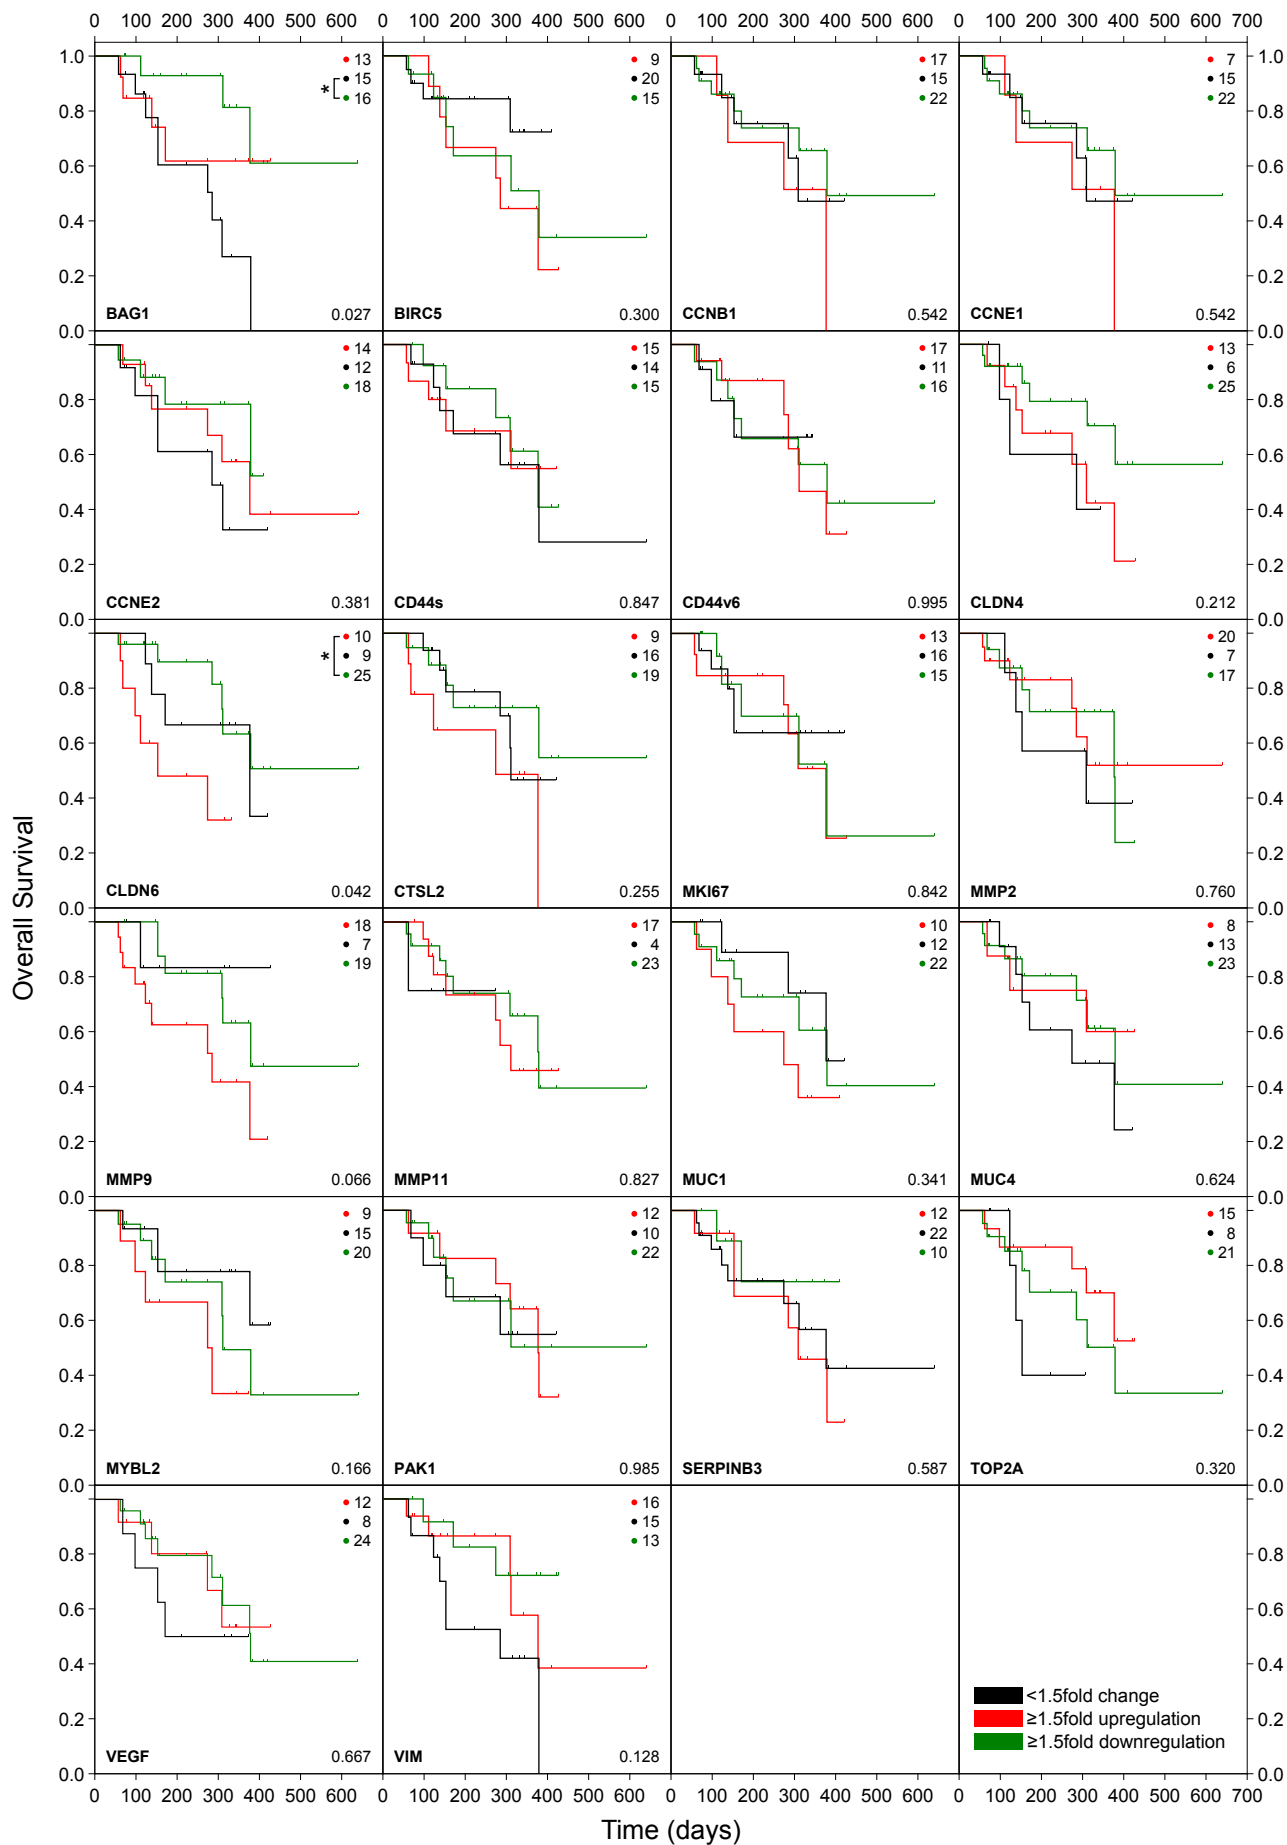

**Supplementary Figure S2.** Overall survival vs. level of gene expression change in peritoneal samples of patients treated with PIPAC. Inside panels: Gene symbol, lower left corner; numbers of patients with upregulated/unchanged/downregulated gene expression (top to bottom), upper right corner; Kaplan-Meier log rank p-value, lower right corner. Statistical significance is indicated by brackets (\*,  $p < 0.05$ ). Cox proportional hazard regression resulted in HR=5.1 (95%CI 1.3-19.0,  $p=0.017$ ) for BAG1 and HR=4.1 (95%CI 1.2-13.6,  $p=0.02$ ) for CLDN6.
