# Supplementary material for: Dynamic changes of tumor gene expression during repeated pressurized intraperitoneal aerosol chemotherapy (PIPAC) in women with peritoneal cancer
Source: PubMed Central journal article supplement (PMC4992274; doi:10.1186/s12885-016-2668-4), 2016-08-19
Supplement: 12885_2016_2668_MOESM5_ESM.pdf [file 12885_2016_2668_MOESM5_ESM.pdf]

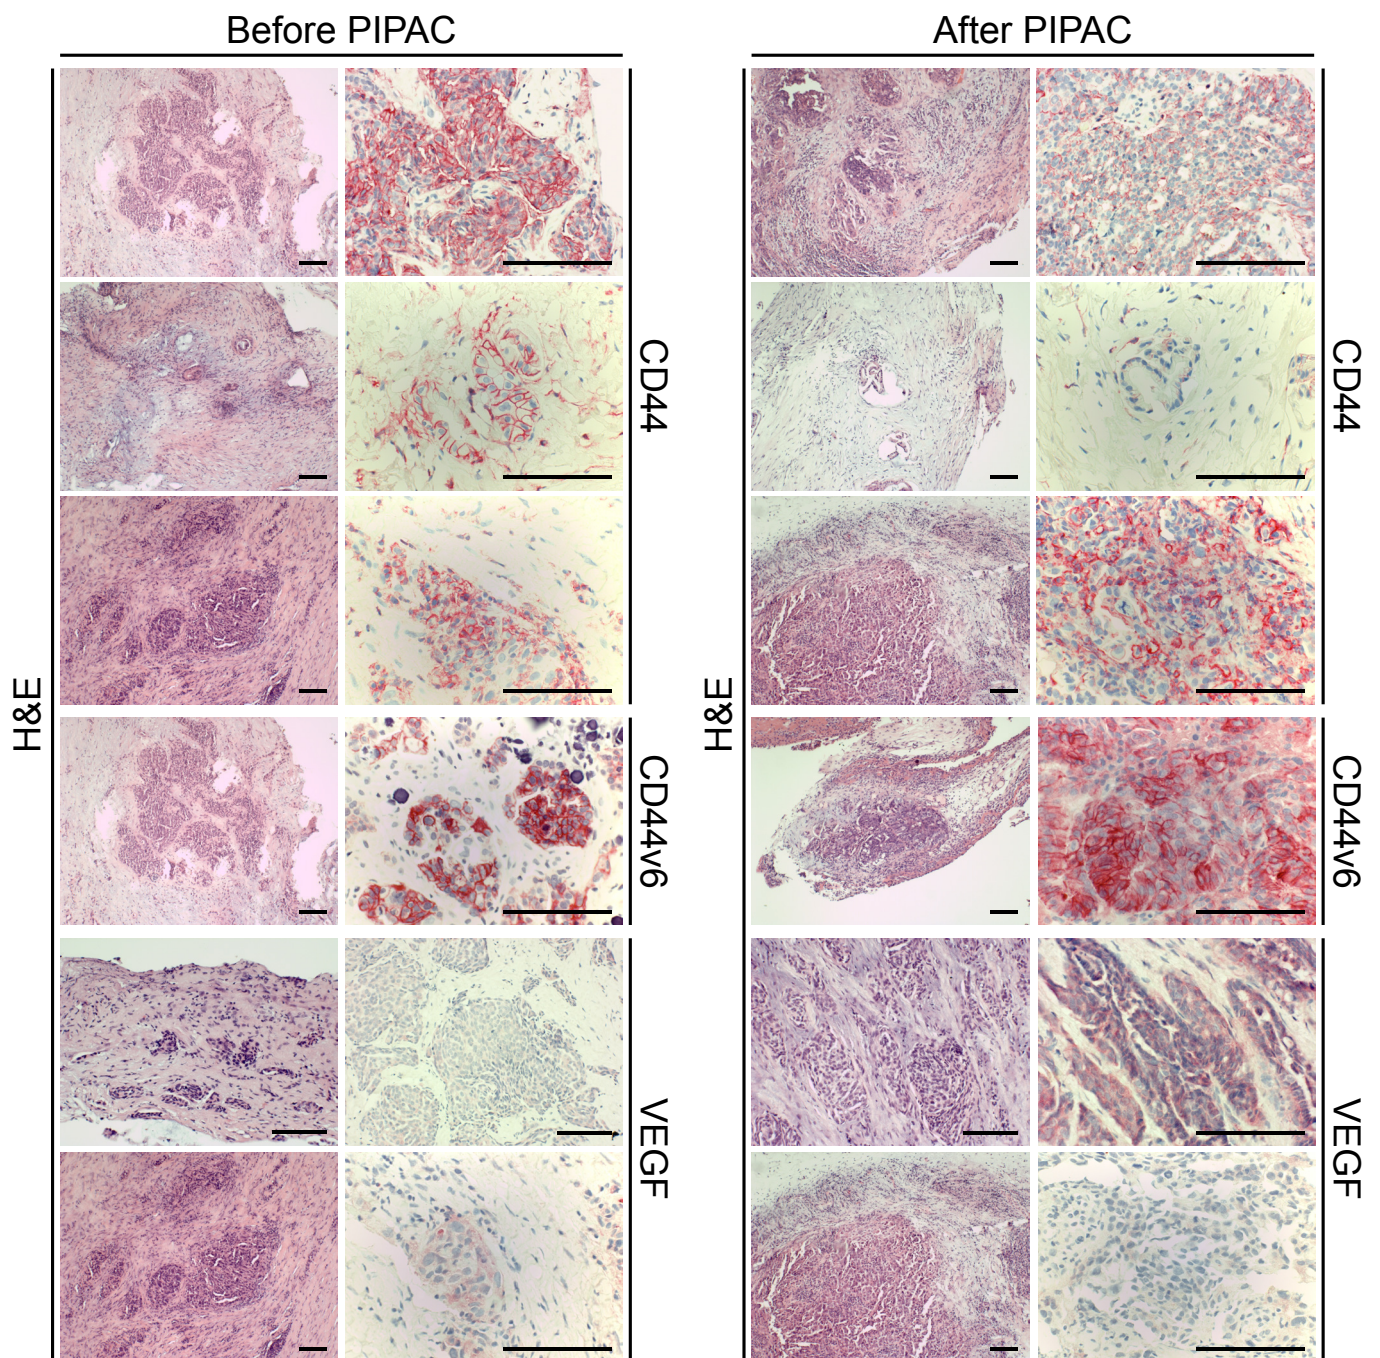

**Supplementary Figure S3.** Exemplary images of haematoxylin/eosin (H&E, left columns) and immunohistochemical (right columns) stainings of tissue sections from patients obtained during initial and subsequent PIPAC treatments (before = IPC-naïve, after = PIPAC 2 or 3) using antibodies to CD44 (all isoforms), CD44 variant 6 (CD44v6), and VEGF. Each row represents samples from an individual patient (note, rows 1 and 4, and rows 3 and 6 are from the same patient, respectively, but not necessarily from the same after-PIPAC timepoint). Scale bars, 100  $\mu$ m.
